# Supplementary material
Source: PubMed Central journal article supplement (PMC3067435)
Supplement: supp_77_7_2545__1.pdf [file supp_77_7_2545__1.pdf]

Table S1. Bacterial strains and plasmids.

*E. coli* and plasmids

|                            |                                                                                                                                        |                                                      |
|----------------------------|----------------------------------------------------------------------------------------------------------------------------------------|------------------------------------------------------|
| DH5 $\alpha$               | <i>supE44 <math>\Delta</math>lacU169 (80 lacZ<math>\Delta</math>M15) hsdR17 recA1 endA1 gyrA96 thi-1 relA1 <math>\lambda</math>pir</i> | Laboratory collection                                |
| DH5 $\alpha$ $\lambda$ pir | <i>supE44 <math>\Delta</math>lacU169 (80 lacZ<math>\Delta</math>M15) hsdR17 recA1 endA1 gyrA96 thi-1 relA1 <math>\lambda</math>pir</i> | Laboratory collection                                |
| DY330                      | W3110 $\Delta$ lacU169 <i>gal490 <math>\lambda</math>cI857 <math>\Delta</math>(cro-bioA)</i>                                           | (7)                                                  |
|                            | pGEM-T easy                                                                                                                            | Promega                                              |
|                            | pKD3 ( <i>FRT-cat-FRT</i> allele)                                                                                                      | (2)                                                  |
|                            | pKD4 ( <i>FRT-kan-FRT</i> allele)                                                                                                      | (2)                                                  |
| MB838                      | pR6K $\gamma$ <i>FRT-gent-FRT</i>                                                                                                      | This work                                            |
|                            | pCP20 (source of <i>flp</i> gene)                                                                                                      | (2)                                                  |
|                            | pMM237 (source of <i>sacB</i> gene)                                                                                                    | (4)                                                  |
|                            | pBluescript KS- (source of ColE1 <i>ori</i> )                                                                                          | Stratagene                                           |
|                            | pMMB206 $\Delta$ mob                                                                                                                   | (6)                                                  |
|                            | pMMBGent-empty                                                                                                                         | (5)                                                  |
|                            | pMMBGent-FliA                                                                                                                          | (5)                                                  |
| MB741                      | pMMBGent<br>(pMMB206 $\Delta$ mob with gentamycin resistance cassette replacing <i>cat</i> )                                           | This work                                            |
| MB789                      | pMMBbve<br>(pMMBGent with <i>sacB</i> cloned downstream of the MCS)                                                                    | This work                                            |
| MB790                      | pMMBFlp<br>(pMMBbve with <i>flp</i> cloned under ptac control)                                                                         | This work                                            |
| MB791                      | pBSFlp<br>(pMMBFlp with ColE1 <i>ori</i> replacing RSF1010 <i>ori</i> )                                                                | This work                                            |
| MB792                      | pGEM <i>letA</i>                                                                                                                       | This work                                            |
| MB793                      | pGEM $\Delta$ <i>letA::FRT-cat-FRT</i>                                                                                                 | This work                                            |
| MB750                      | pGEM <i>fliA</i>                                                                                                                       | This work                                            |
| MB751                      | pGEM $\Delta$ <i>fliA::FRT-cat-FRT</i>                                                                                                 | This work                                            |
| MB748                      | pGEM <i>xseA</i>                                                                                                                       | Bryan A and Swanson MS,<br>submitted for publication |
| MB749                      | pGEM $\Delta$ <i>xseA::FRT-kan-FRT</i>                                                                                                 | Bryan A and Swanson MS,<br>submitted for publication |
| MB747                      | pGEM $\Delta$ <i>recJ::FRT-cat-FRT</i>                                                                                                 | Bryan A and Swanson MS,<br>submitted for publication |
| MB794                      | pGEM <i>pg0558</i>                                                                                                                     | This work                                            |
| MB795                      | pGEM $\Delta$ <i>pg0558::FRT-cat-FRT</i>                                                                                               | This work                                            |
| MB796                      | pGEM <i>pg1116</i>                                                                                                                     | This work                                            |
| MB797                      | pGEM $\Delta$ <i>pg1116::FRT-cat-FRT</i>                                                                                               | This work                                            |
| MB798                      | pGEM <i>pg1889</i>                                                                                                                     | This work                                            |
| MB799                      | pGEM $\Delta$ <i>pg1889::FRT-cat-FRT</i>                                                                                               | This work                                            |
| MB800                      | pGEM <i>pg1918</i>                                                                                                                     | This work                                            |
| MB801                      | pGEM $\Delta$ <i>pg1918::FRT-cat-FRT</i>                                                                                               | This work                                            |
| MB802                      | pGEM <i>pg2217</i>                                                                                                                     | This work                                            |
| MB803                      | pGEM $\Delta$ <i>pg2217::FRT-cat-FRT</i>                                                                                               | This work                                            |
| MB804                      | pGEM <i>pg2343</i>                                                                                                                     | This work                                            |

|       |                                   |           |
|-------|-----------------------------------|-----------|
| MB805 | pGEMΔ <i>lpg2343::FRT-cat-FRT</i> | This work |
| MB806 | pGEM <i>lpg2918</i>               | This work |
| MB807 | pGEMΔ <i>lpg2918::FRT-cat-FRT</i> | This work |

*L. pneumophila*\*

|       |                                                                             |                                                   |
|-------|-----------------------------------------------------------------------------|---------------------------------------------------|
| MB110 | Lp02 wild type, <i>thyA</i> , <i>hsdR</i> , <i>rpsL</i> (Str <sup>R</sup> ) | (1)                                               |
| MB413 | <i>letA::kan</i> transposon insertion                                       | (3)                                               |
| MB808 | Lp02 <i>fliA::kan</i> transposon insertion, pMMBGent-empty                  | (5)                                               |
| MB510 | Lp02 <i>fliA::kan</i> transposon insertion, pMMBGent-FliA                   | (5)                                               |
| MB560 | Lp02 <i>motAB::gent</i>                                                     | (5)                                               |
| MB809 | Lp02 Δ <i>letA::FRT-cat-FRT</i> , pMMBbve (vector control)                  | This work                                         |
| MB810 | Lp02 Δ <i>letA::FRT-cat-FRT</i> , pMMBF1p                                   | This work                                         |
| MB811 | Lp02 Δ <i>fliA::FRT-cat-FRT</i>                                             | This work                                         |
| MB812 | Lp02 Δ <i>fliA::FRT-cat-FRT</i> , pMMBF1p                                   | This work                                         |
| MB813 | Lp02 Δ <i>fliA::FRT-cat-FRT</i> , pBSF1p                                    | This work                                         |
| MB814 | Lp02 Δ <i>fliA::FRT-cat-FRT</i> , pMMBGent-FliA                             | This work                                         |
| MB815 | Lp02 Δ <i>fliA::FRT</i> , Supplemental Method                               | This work                                         |
| MB816 | Lp02 Δ <i>fliA::FRT</i> , Supplemental Method, pMMBGent-empty               | This work                                         |
| MB817 | Lp02 Δ <i>fliA::FRT</i> , Supplemental Method, pMMBGent-FliA                | This work                                         |
| MB818 | Lp02 Δ <i>fliA::FRT</i>                                                     | This work                                         |
| MB758 | Lp02 Δ <i>recJ::FRT-cat-FRT</i>                                             | Bryan A and Swanson MS, submitted for publication |
| MB819 | Lp02 Δ <i>recJ::FRT</i>                                                     | This work                                         |
| MB759 | Lp02 Δ <i>xseA::FRT-kan-FRT</i>                                             | Bryan A and Swanson MS, submitted for publication |
| MB820 | Lp02 Δ <i>xseA::FRT</i>                                                     | This work                                         |
| MB760 | Lp02 Δ <i>recJ::FRT-cat-FRT</i> , Δ <i>xseA::FRT-kan-FRT</i>                | Bryan A and Swanson MS, submitted for publication |
| MB821 | Lp02 Δ <i>recJ::FRT</i> , Δ <i>xseA::FRT</i>                                | This work                                         |
| MB822 | Lp02 Δ <i>lpg0558::FRT-cat-FRT</i>                                          | This work                                         |
| MB823 | Lp02 Δ <i>lpg0558::FRT</i> , Supplemental Method                            | This work                                         |
| MB824 | Lp02 Δ <i>lpg1116::FRT-cat-FRT</i>                                          | This work                                         |
| MB825 | Lp02 Δ <i>lpg1116::FRT</i> , Supplemental Method                            | This work                                         |
| MB826 | Lp02 Δ <i>lpg1889::FRT-cat-FRT</i>                                          | This work                                         |
| MB827 | Lp02 Δ <i>lpg1889::FRT</i> , Supplemental Method                            | This work                                         |
| MB828 | Lp02 Δ <i>lpg1918::FRT-cat-FRT</i>                                          | This work                                         |
| MB829 | Lp02 Δ <i>lpg1918::FRT</i> , Supplemental Method                            | This work                                         |
| MB830 | Lp02 Δ <i>lpg2217::FRT-cat-FRT</i>                                          | This work                                         |
| MB831 | Lp02 Δ <i>lpg2217::FRT</i> , Supplemental Method                            | This work                                         |
| MB832 | Lp02 Δ <i>lpg2217::FRT</i>                                                  | This work                                         |
| MB833 | Lp02 Δ <i>lpg2343::FRT-cat-FRT</i>                                          | This work                                         |
| MB834 | Lp02 Δ <i>lpg2343::FRT</i> , Supplemental Method                            | This work                                         |
| MB835 | Lp02 Δ <i>lpg2918::FRT-cat-FRT</i>                                          | This work                                         |
| MB836 | Lp02 Δ <i>lpg2918::FRT</i> , Supplemental Method                            | This work                                         |

\*Strains were constructed as described in text, except for those listed as constructed with the Supplemental Method (also see Fig 1 and Fig S1).

#### Supplemental Method:

To induce Flp expression and excision of resistance cassettes, pMMBFlp was transferred by electroporation to strains containing *FRT*-flanked deletion constructs, which were then cultured overnight in AYET containing IPTG (200  $\mu$ M) and gentamycin (10  $\mu$ g/mL). To remove IPTG and antibiotic, cells were washed twice and then cultured overnight in AYET to mid-exponential phase. To enrich for bacteria that had lost pMMBFlp, cells were diluted into AYET + 5% sucrose, cultured overnight or until growth was visible, and then isolated on CYET + 5% sucrose. Finally, colonies which were likely to have lost or inactivated *sacB*, identified by their non-mucoid morphology were screened for gentamycin and chloramphenicol sensitivity, and the size of the putative unmarked deletion allele was verified by PCR. The predicted scar sequence following Flp-mediated excision was confirmed by sequencing two independent deletions. To test the fidelity of the method, deletions were constructed in numerous loci that were relevant to other projects in our laboratory: *letA*, *fliA*, *lpg0558*, *lpg1116*, *lpg1889*, *lpg1918*, *lpg2217*, *lpg2343* and *lpg2918*. Although we occasionally observed unusual growth characteristics after the antibiotic cassette was excised by this method (Fig S1), we nevertheless describe the unmarked strains here in the event they are of interest to others in the community. On the other hand, we have not observed unusual growth patterns for the corresponding antibiotic-resistant progenitors or the unmarked mutants generated using the less stable plasmid pBSFlp as described in the main text.

## Strain References

1. **Berger, K. H., and R. R. Isberg.** 1993. Two distinct defects in intracellular growth complemented by a single genetic locus in *Legionella pneumophila*. *Mol. Microbiol.* **7**:7-19.
2. **Datsenko, K. A., and B. L. Wanner.** 2000. One-step inactivation of chromosomal genes in *Escherichia coli* K-12 using PCR products. *Proc. Natl Acad. Sci. USA* **97**:6640-6645.
3. **Hammer, B. K., E. S. Tateda, and M. S. Swanson.** 2002. A two-component regulator induces the transmission phenotype of stationary-phase *Legionella pneumophila*. *Mol. Microbiol.* **44**:107-118.
4. **McClain, M. S., M. C. Hurley, J. K. Brieland, and N. C. Engleberg.** 1996. The *Legionella pneumophila hel* locus encodes intracellularly induced homologs of heavy-metal ion transporters of *Alcaligenes* spp. *Infect. Immun.* **64**:1532-1540.
5. **Molofsky, A. B., L. M. Shetron-Rama, and M. S. Swanson.** 2005. Components of the *Legionella pneumophila* flagellar regulon contribute to multiple virulence traits, including lysosome avoidance and macrophage death. *Infect. Immun.* **73**:5720-5734.
6. **Molofsky, A. B., and M. S. Swanson.** 2003. *Legionella pneumophila* CsrA is a pivotal repressor of transmission traits and activator of replication. *Mol. Microbiol.* **50**:445-461.
7. **Yu, D., H. M. Ellis, E. C. Lee, N. A. Jenkins, N. G. Copeland, and D. L. Court.** 2000. An efficient recombination system for chromosome engineering in *Escherichia coli*. *Proc. Natl. Acad. Sci. USA* **97**:5978-5983.
